# Supplementary material
Source: Springer Nature journal article supplement (https://www.springermedizin.de/resource/supplementary/12957_2013_1576_MOESM1_ESM.pdf/9563888)

22:22:27.035193  
GZCHESTnoC

2277214

SE 2/5  
IM 14/46  
DFOV 40.5CM  
MAG 0.99

M 61Y  
HFS  
1504329  
Sensation 16

R

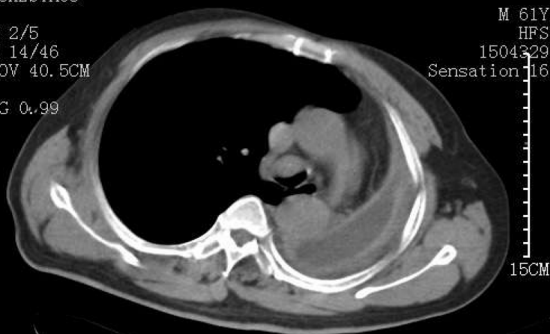

15CM

SFOV 50.0CM  
KV 120  
mA 173  
TI 0.5  
GT 0.0

LOCA -110.00  
7.0/0.0

B41f  
ThoraxRoutine 7.0 B41f HFS

W:400 L:40

**B**

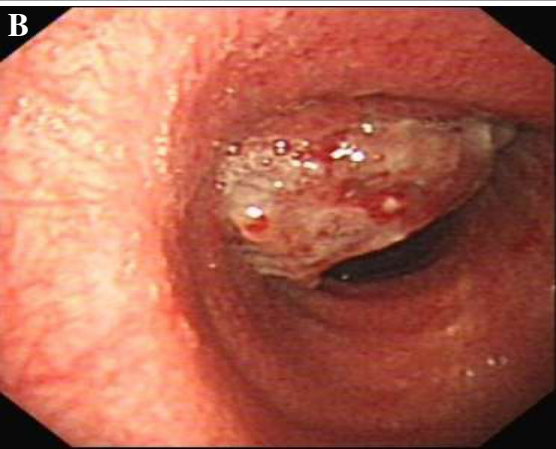

Supplement: MOESM1 [file 9563888]
